# Supplementary material for: New insights into the type A glycan modification of Clostridioides difficile flagellar protein flagellin C by phosphoproteomics analysis
Source: PubMed Central journal article supplement (PMC8861647; doi:10.1016/j.jbc.2022.101622), 2022-01-20
Supplement: mmc1.pdf [file mmc1.pdf]

# Supporting Information

New insights into *C. difficile* strain 630 flagellin C modifications by  
phosphoproteomics analysis

Paul J. Hensbergen<sup>†\*</sup>, Arnoud H. de Ru<sup>†</sup>, Annemieke H. Friggen<sup>†</sup>, Jeroen Corver<sup>†</sup>, Wiep Klaas Smits<sup>†</sup>,

Peter A. van Veelen<sup>†</sup>

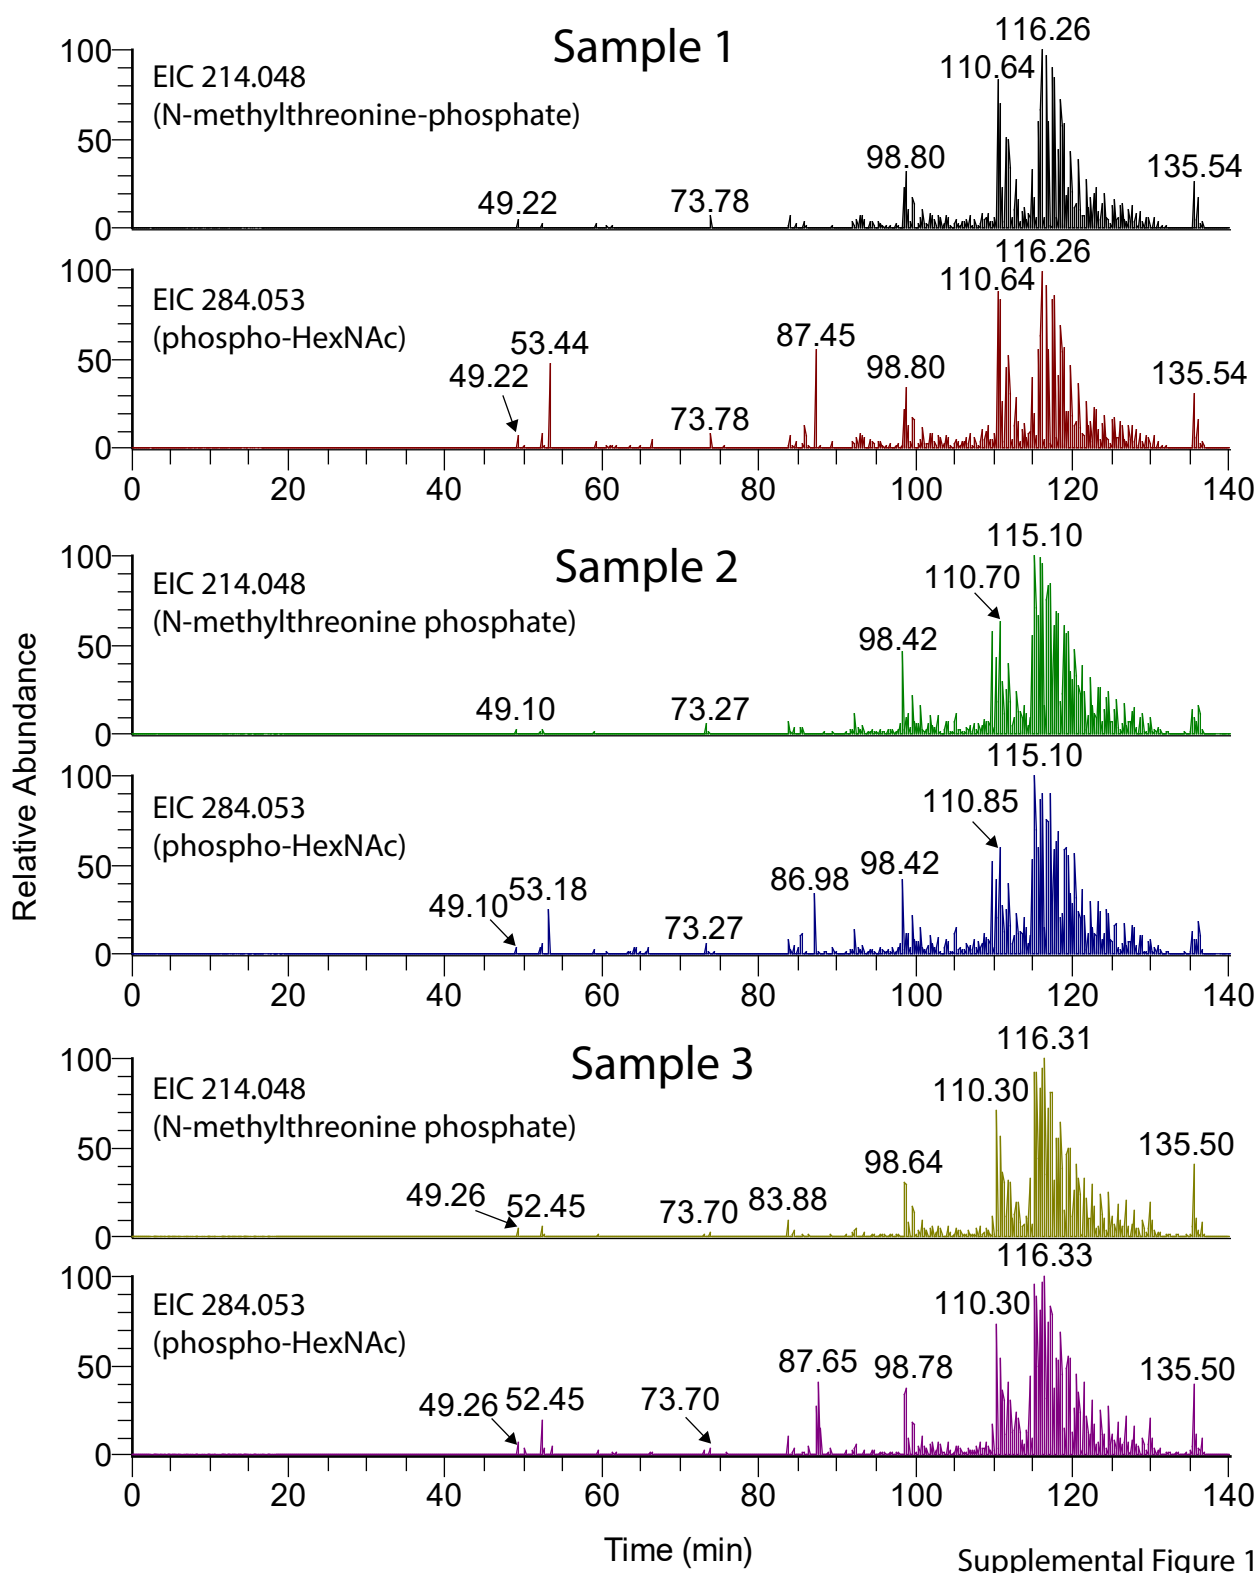

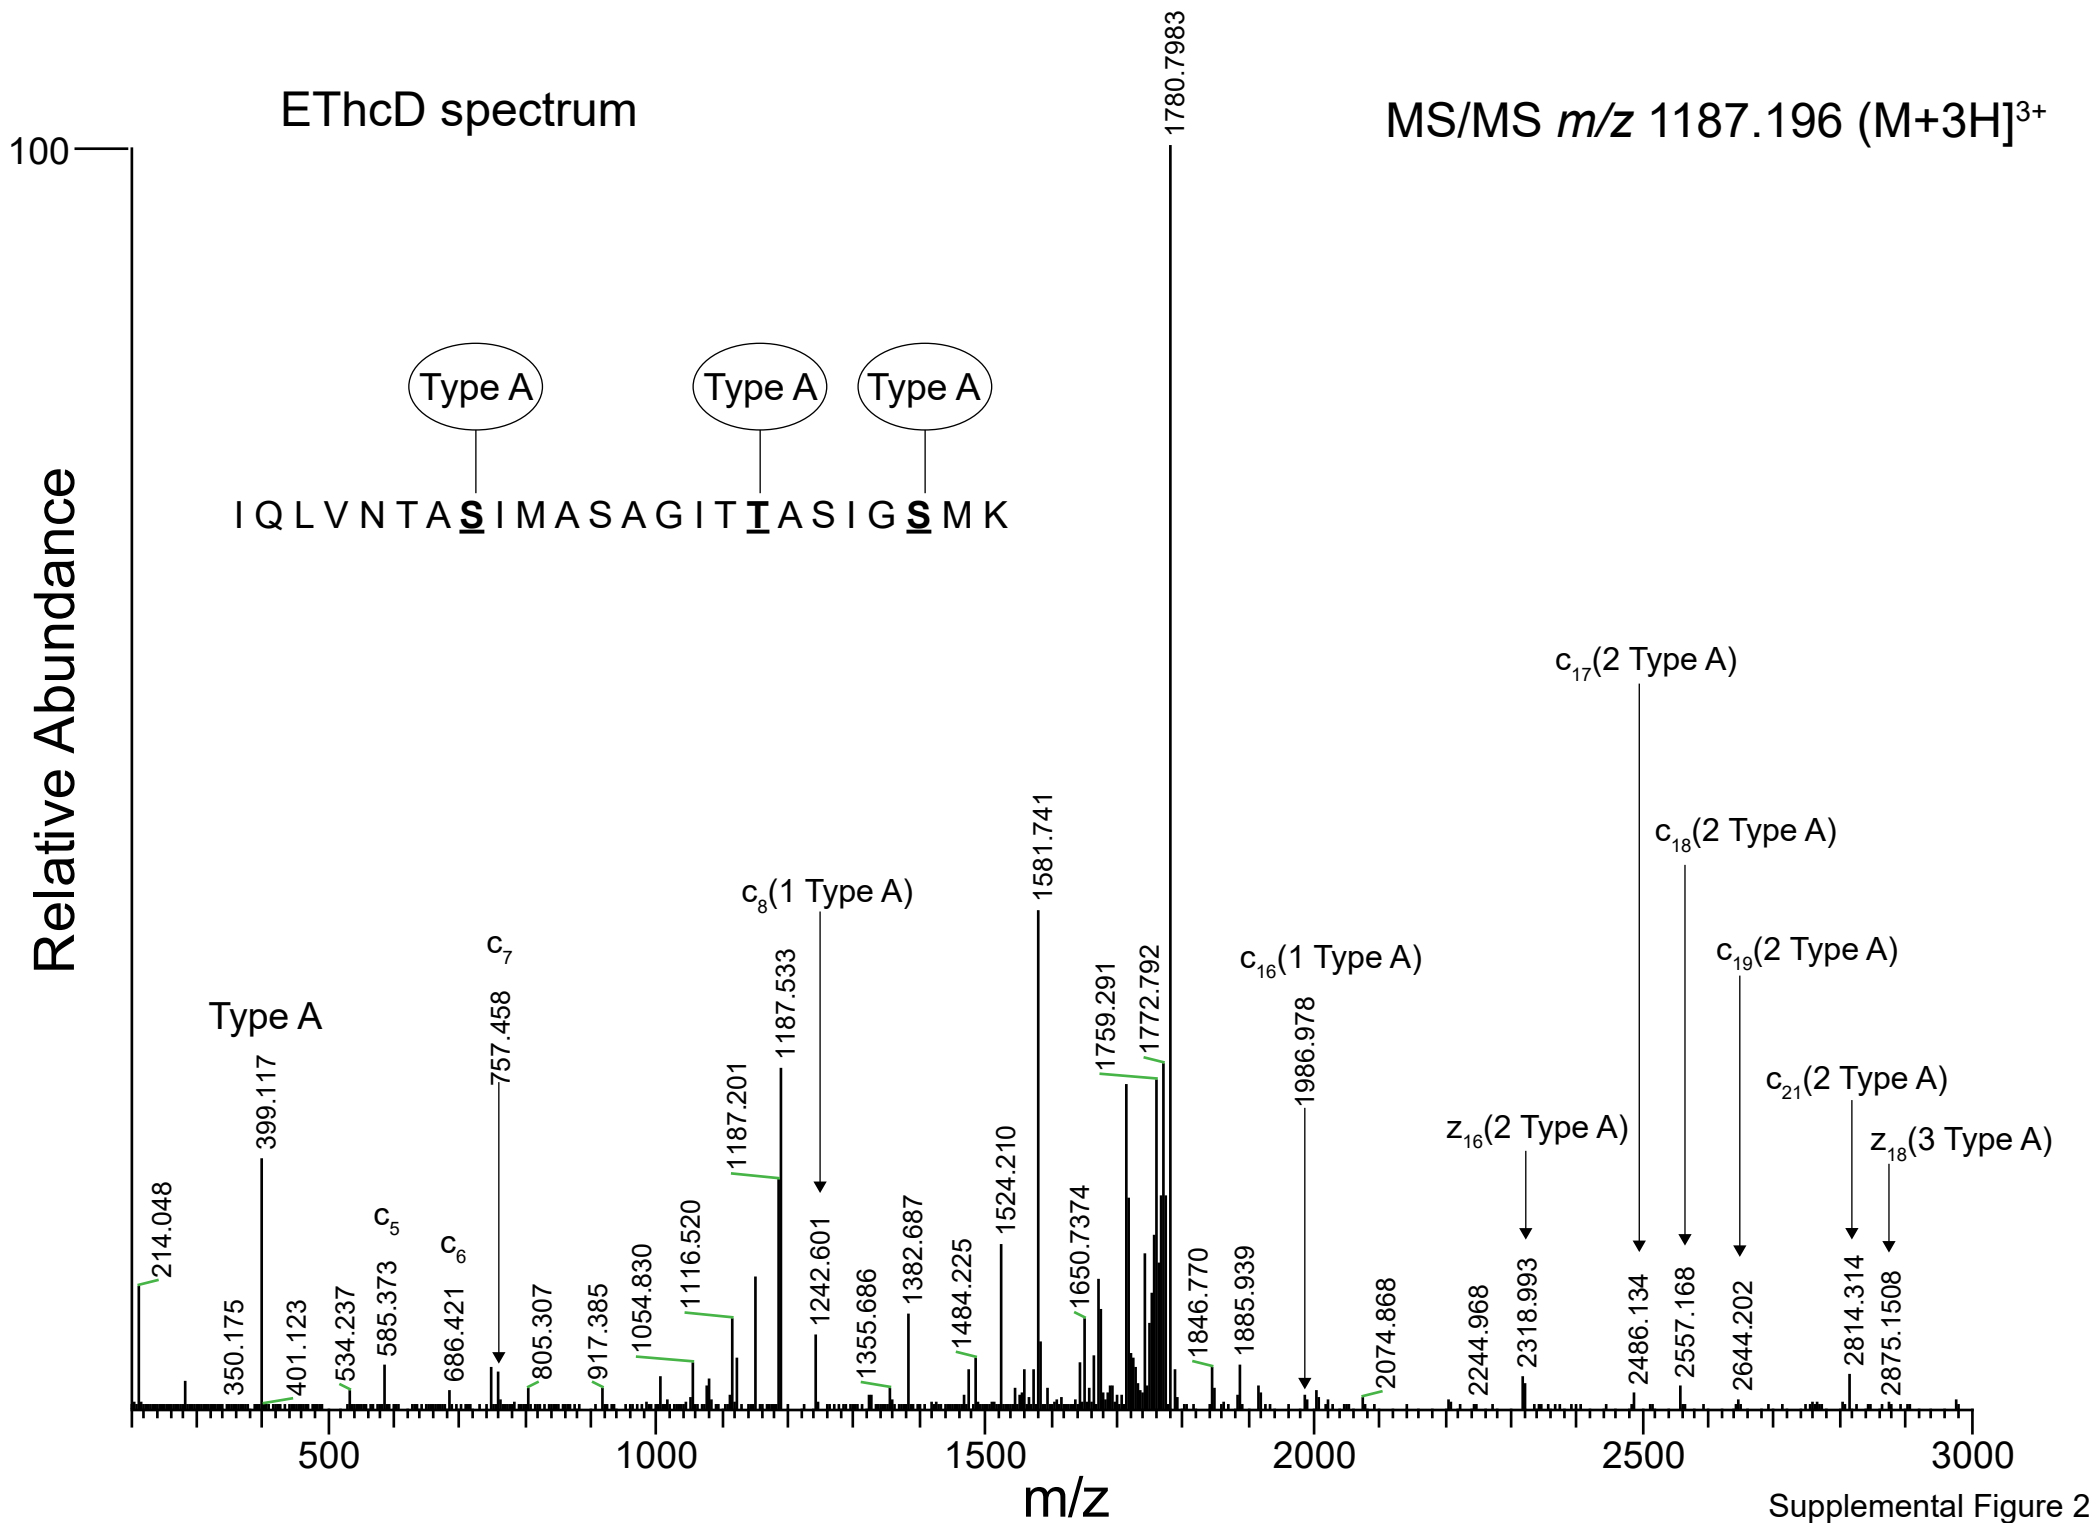

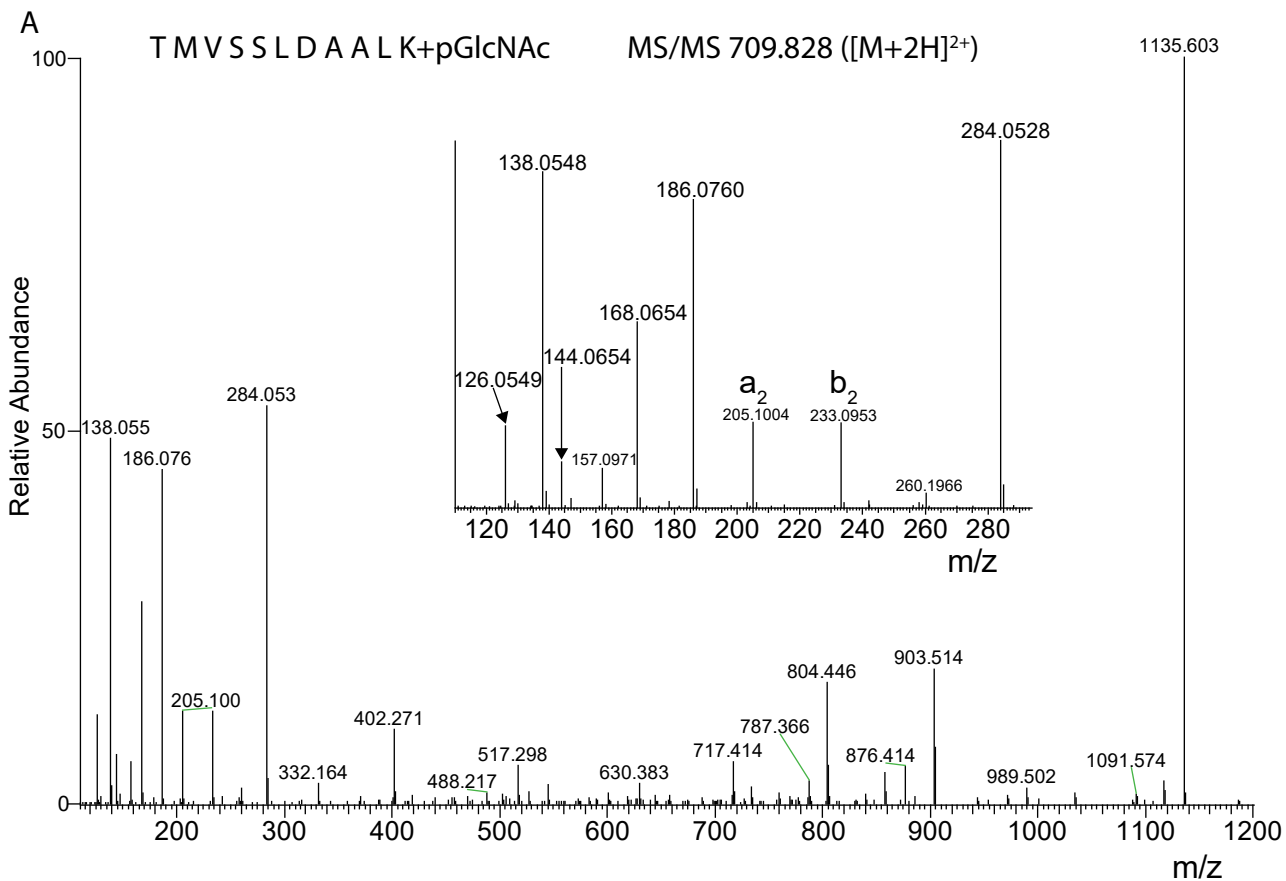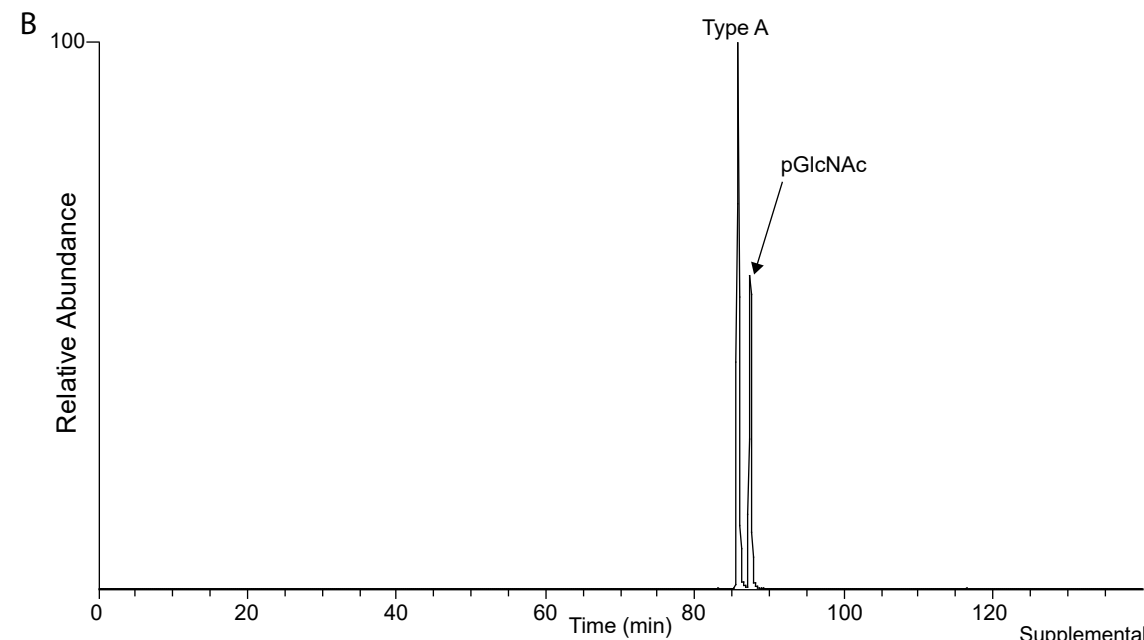

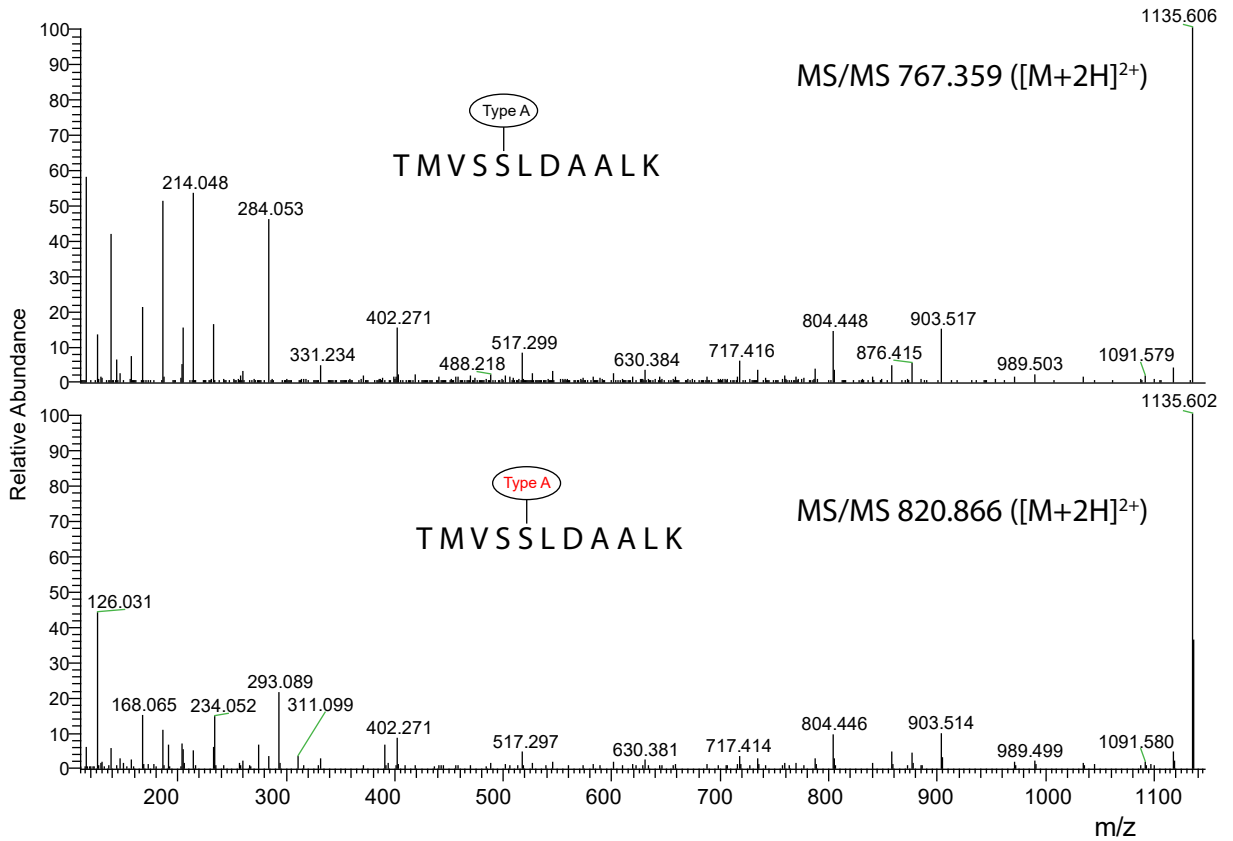

A

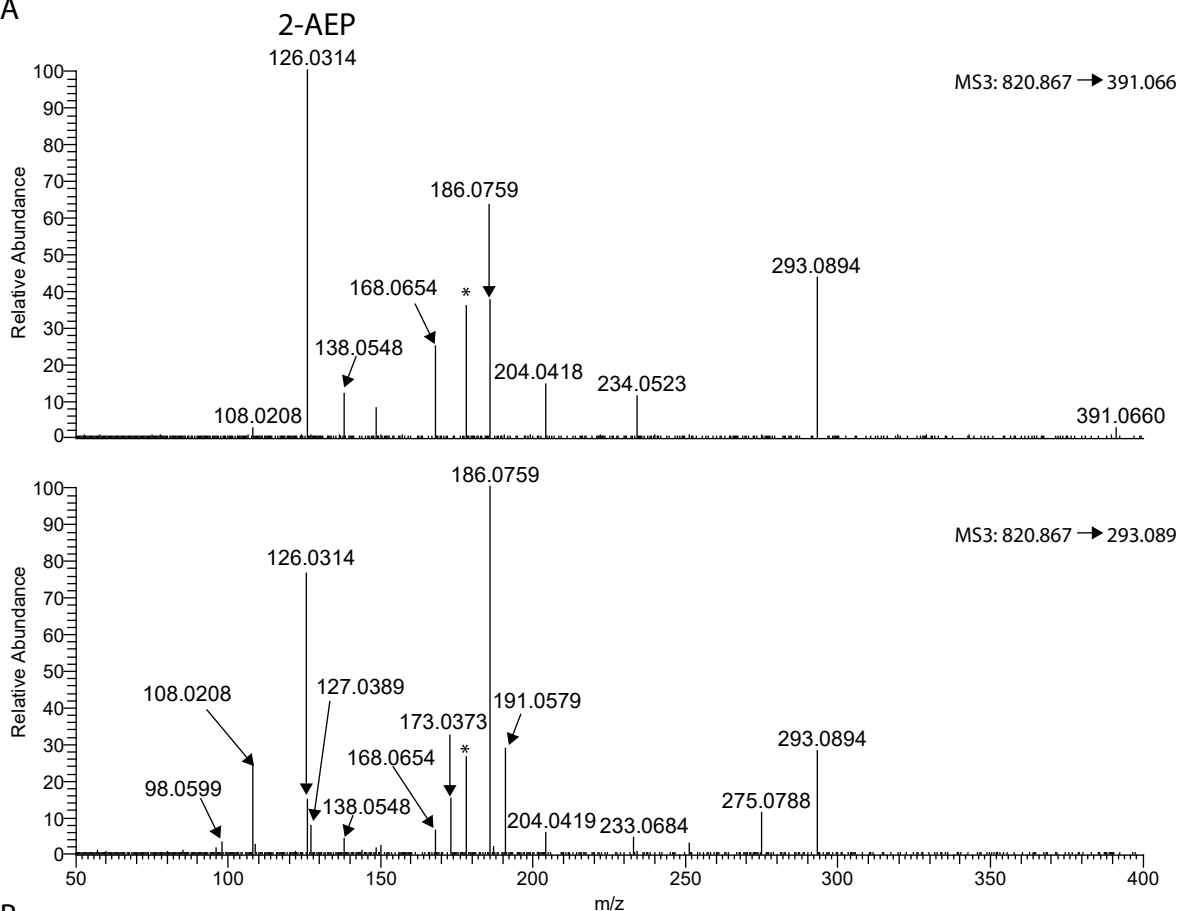

B

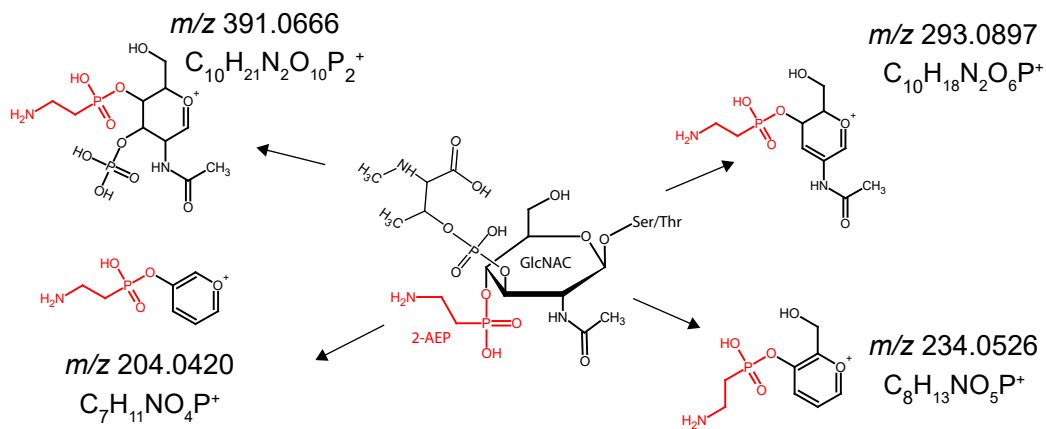

## Figure legend Supplemental Figures

**Supplemental Figure 1.** Comparison of extracted ion chromatograms of Type A specific fragment ions in LC-MS/MS data from IMAC purified peptides from three independent *C. difficile* cultures.

**Supplemental Figure 2.** EThcD of the flagellin C tryptic peptide IQLVNTASIMASAGITTASIGSMK carrying three Type A structures (see Figure 2A).

**Supplemental Figure 3.** A. MS/MS spectrum of the flagellin C tryptic peptide TMVSSLDAALK carrying a phospho-GlcNAc (pGlcNAc). B. Chromatographic profile of the tryptic peptide TMVSSLDAALK modified with either a Type A structure or a pGlcNAc.

**Supplemental Figure 4.** Comparison of the MS/MS fragmentation spectrum of the flagellin C tryptic peptide TMVSSLDAALK carrying either a Type A structure (upper panel) or an alternative Type A structure (indicated in red) with an additional mass of 107.013 Da (lower panel, fully annotated in Figure 4). Subsequent analyses showed that this alternative Type A structure corresponds to 2-AEP-Type A (see Figure 4 for further details).

**Supplemental Figure 5.** A. MS3 fragmentation of the flagellin C tryptic peptide TMVSSLDAALK carrying a 2-AEP-Type A structure, where either the fragment ion at  $m/z$  391.066 (upper panel) or 293.089 (lower panel) were selected for additional fragmentation. See Figure 4A for the MS2 fragmentation spectrum. B. Tentative assignment of 2-AEP containing fragments observed in the MS2 and MS3 spectrum of the flagellin C tryptic peptide TMVSSLDAALK carrying a 2-AEP-Type A structure. The signal indicated with an asterisk (\*) at  $m/z$  178.243 is a background signal of unknown origin which was observed in all fragmentation spectra.
